# Supplementary material for: Ethyl cyanoacrylate reinforced polyvinylidene fluoride separators for robust lithium ion batteries
Source: Royal Society of Chemistry journal article supplement (doi:10.1039/d0qm00976h), 2021-01-01
Supplement: d0qm00976h1.pdf [file d0qm00976h1.pdf]

*Supporting Information*

**Ethyl cyanoacrylate reinforced polyvinylidene fluoride  
separators for robust lithium ion batteries**

Mengqiu Yang<sup>†,1</sup>, Yuanpeng Liu<sup>†,1</sup>, Botao Yuan<sup>†,2</sup>, Zhaoxu Guang<sup>2</sup>, Jipeng Liu<sup>1</sup>, Liwei Dong<sup>1</sup>, Yuanpeng Ji<sup>1</sup>, Qun Li<sup>1</sup>, Yifang Liang<sup>1</sup>, Yunfa Dong<sup>2</sup>, Sue Hao<sup>1,3</sup>, Chunhui Yang<sup>1,3</sup>, Weidong He<sup>\*,2</sup>

<sup>1</sup>MIIT Key Laboratory of Critical Materials Technology for New Energy Conversion and Storage, School of Chemistry and Chemical Engineering, Harbin Institute of Technology, Harbin 150080, China.

<sup>2</sup>National Key Laboratory of Science and Technology on Advanced Composites in Special Environments, and Center for Composite Materials and Structures, Harbin Institute of Technology, Harbin 150080, China.

<sup>3</sup>State Key Laboratory of Urban Water Resource and Environment, Harbin Institute of Technology, Harbin 150080, China.

**Corresponding Author**

\*E-mail: [weidong.he@hit.edu.cn](mailto:weidong.he@hit.edu.cn).

†These authors have contributed equally.

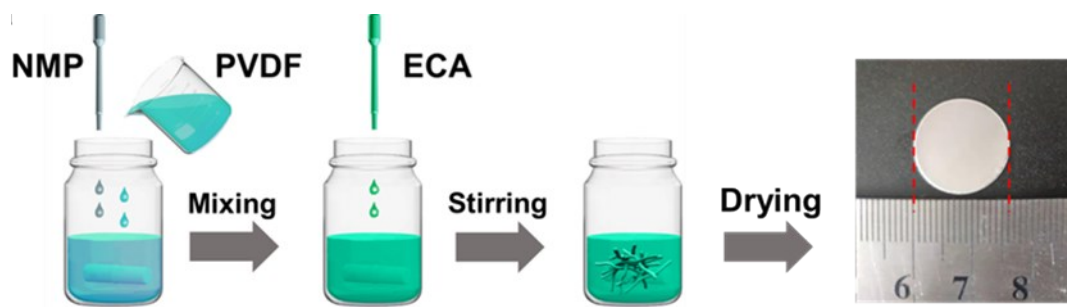

**Figure S1.** Illustration of the synthetic procedure and digital photo of the ECA-15 separator

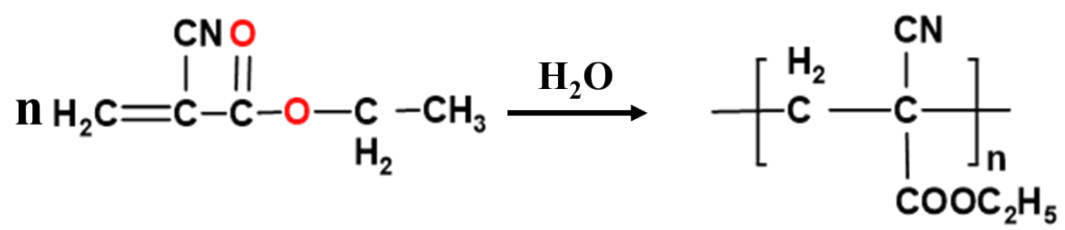

**Figure S2.** The anion polymerization of ECA with water molecules

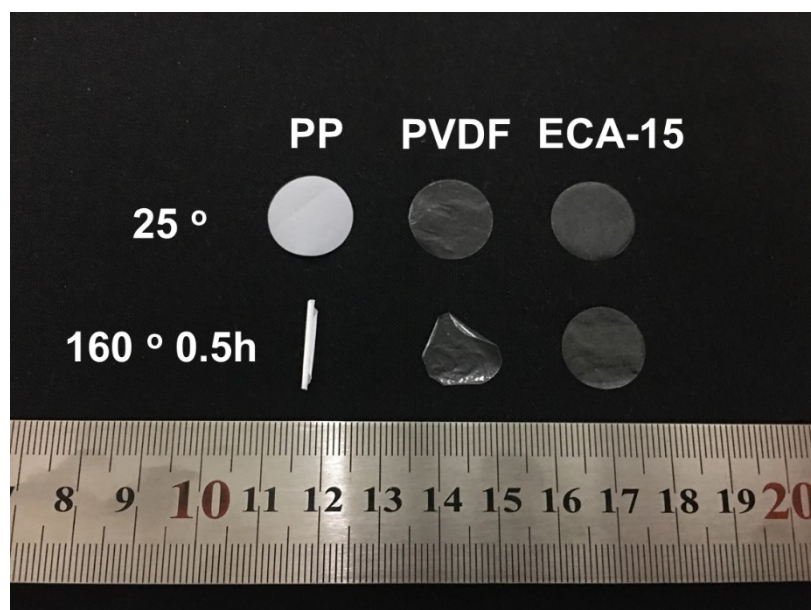

**Figure S3.** Optical photograph of PP, PVDF and ECA-15 separators at 160 ° after 0.5h.

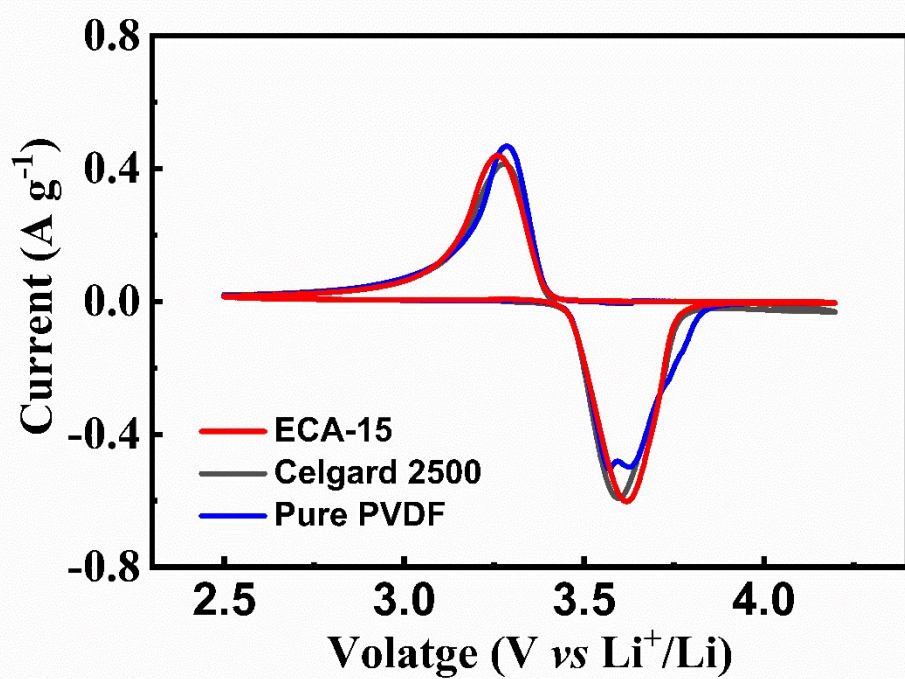

**Figure S4.** Cyclic voltammograms of ECA-15, Celgard 2500 and pure PVDF separators at 0.2 mV s<sup>-1</sup>.

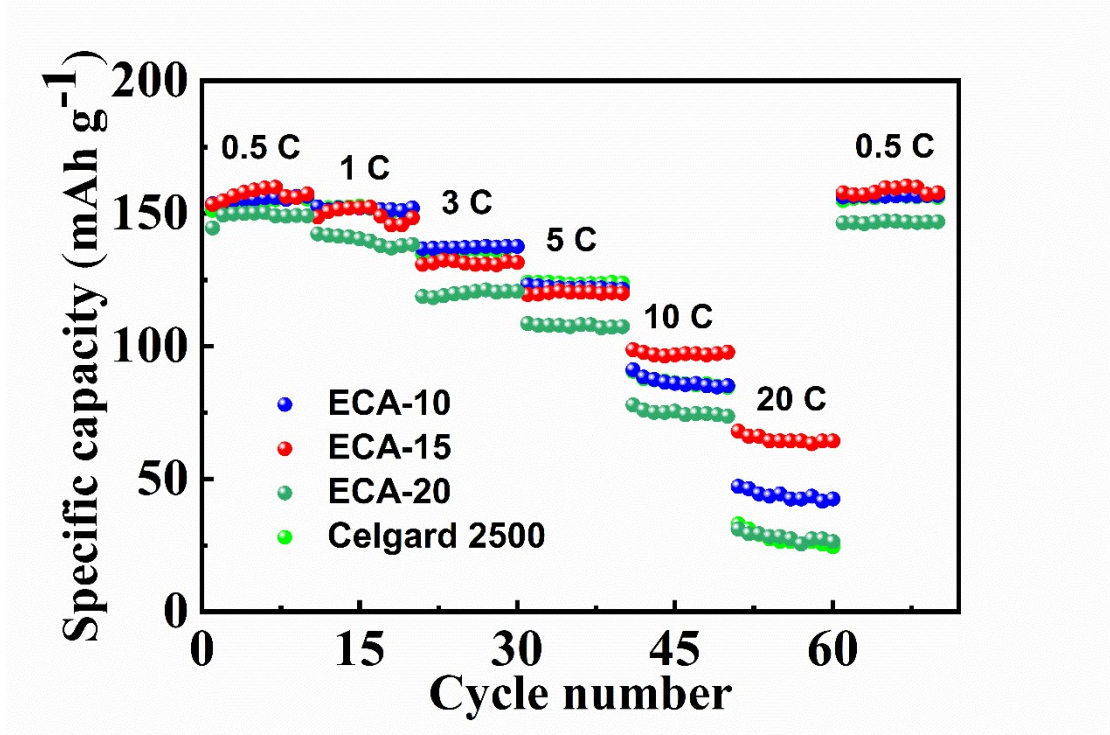

Figure S5. Rate performances of Celgard 2500, Pure PVDF and ECA-15 separators.

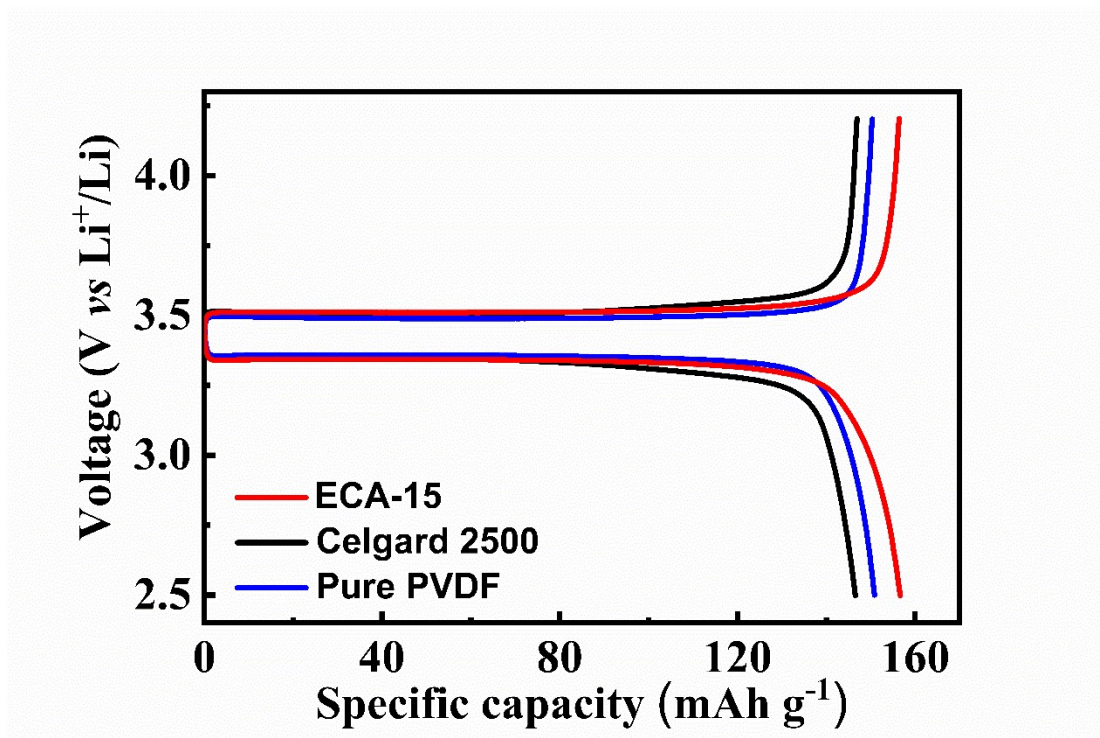

**Figure S6.** Charge/discharge profiles of Celgard 2500, Pure PVDF and ECA-15 separators.

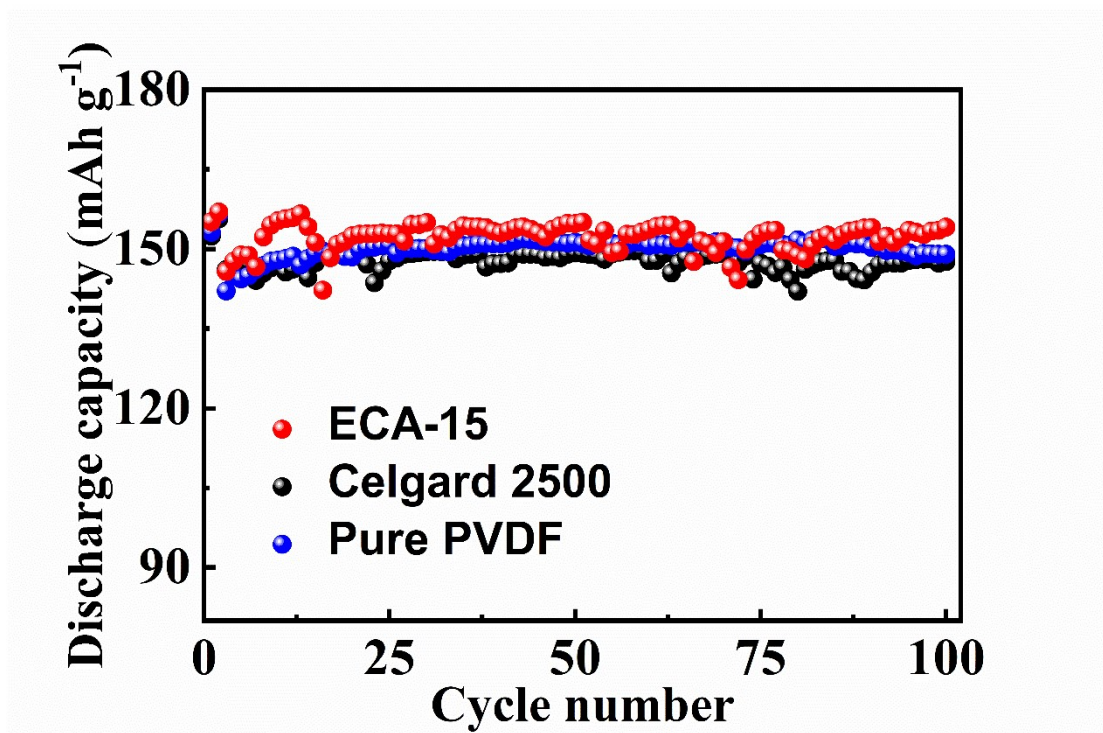

**Figure S7.** Cycling performances of LFP/Li with ECA-15, pure PVDF and Celgard 2500 separators.



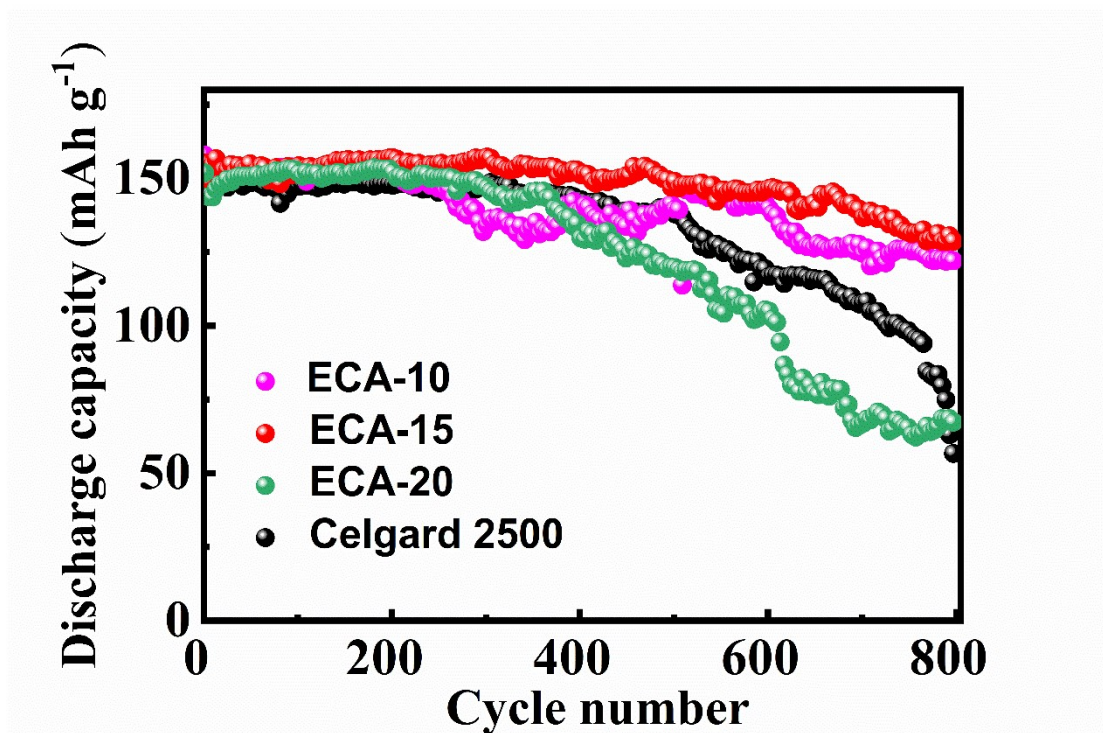

**Figure S8.** Cycling performances of LFP/Li with ECA-10, ECA-15, ECA-20 and Celgard 2500 separators.

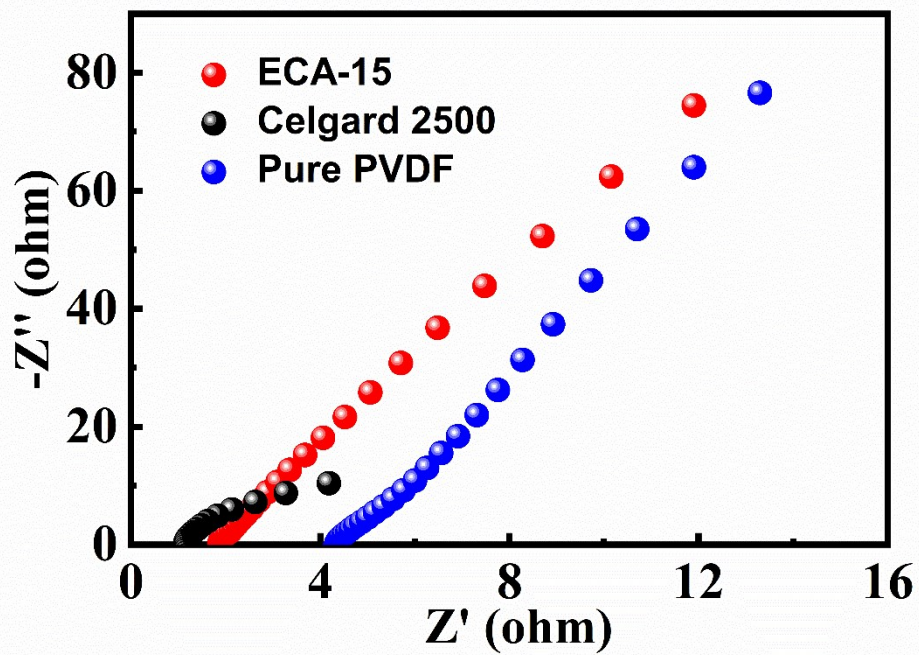

**Figure S9.** Electrochemical impedance spectroscopies of batteries with Celgard 2500, pure PVDF and ECA-15, respectively.

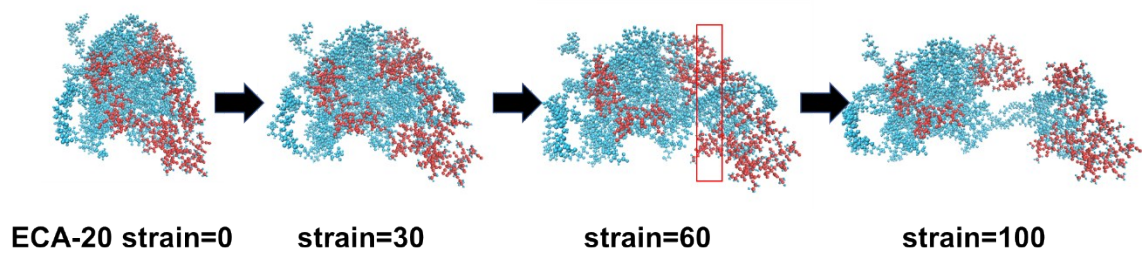

**Figure S10.** MD simulation of ECA-20 separator.

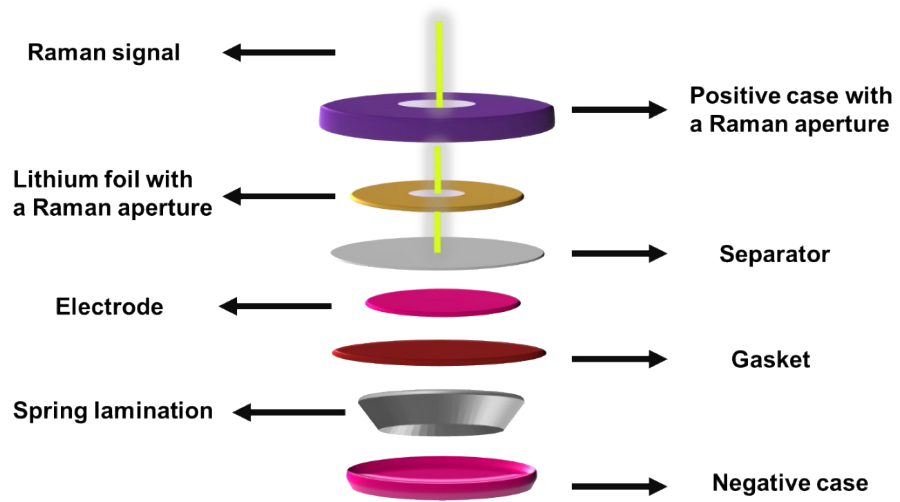

**Figure S11.** The cell configuration for in situ Raman spectroscopic analyze

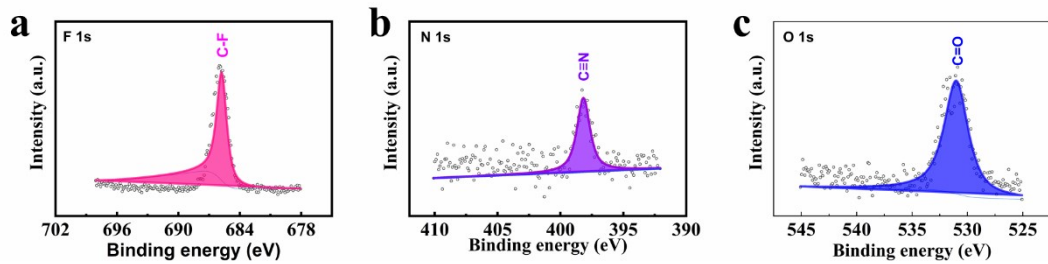

**Figure S12.** High-resolution XPS spectrum of F 1s, N 1s and O 1s in ECA-15 separator.
